# Supplementary material for: Assessment of matrix effects induced by chloride, sulfate and dissolved organic carbon during Si isotope measurements by MC-ICP-MS under wet plasma conditions
Source: Royal Society of Chemistry journal article supplement (doi:10.1039/d3ja00290j), 2024-01-01
Supplement: d3ja00290j1.pdf [file d3ja00290j1.pdf]

## Appendix

Table A. Mean  $\delta^{30}\text{Si}$  and  $\delta^{29}\text{Si}$  values of each sample during tests for sulfate, chloride, and a mix of both anions, and the associated 2 SD = two standard deviation and their 95% confidence intervals ( $CI = t \times SD/\sqrt{n}$ ).

|                                                        | Ratio        | $\delta^{30}\text{Si}$ (‰) |      |        | $\delta^{29}\text{Si}$ (‰) |      |        | <i>n</i> |
|--------------------------------------------------------|--------------|----------------------------|------|--------|----------------------------|------|--------|----------|
|                                                        | [Anion]/[Si] | mean                       | 2 SD | 95% CI | mean                       | 2 SD | 95% CI |          |
| undoped NBS 28                                         | 0            | -0.01                      | 0.09 | 0.01   | 0.00                       | 0.09 | 0.01   | 97       |
| Cl <sup>-</sup> test                                   | 0.09         | -0.01                      | 0.07 | 0.06   | -0.02                      | 0.03 | 0.02   | 4        |
|                                                        | 0.12         | 0.01                       | 0.05 | 0.04   | 0.02                       | 0.05 | 0.04   | 4        |
|                                                        | 0.15         | -0.04                      | 0.08 | 0.04   | -0.03                      | 0.03 | 0.02   | 4        |
|                                                        | 0.18         | 0.01                       | 0.06 | 0.04   | 0.02                       | 0.08 | 0.07   | 4        |
|                                                        | 0.39         | -0.03                      | 0.10 | 0.04   | -0.01                      | 0.10 | 0.08   | 4        |
|                                                        | 0.55         | -0.01                      | 0.12 | 0.04   | 0.02                       | 0.06 | 0.05   | 4        |
|                                                        | 0.72         | 0.03                       | 0.04 | 0.04   | 0.01                       | 0.06 | 0.05   | 4        |
|                                                        | 1.06         | 0.01                       | 0.07 | 0.04   | 0.03                       | 0.07 | 0.06   | 4        |
|                                                        | 1.75         | 0.08                       | 0.10 | 0.04   | 0.05                       | 0.05 | 0.04   | 4        |
|                                                        | 2.79         | 0.00                       | 0.07 | 0.04   | 0.00                       | 0.07 | 0.06   | 4        |
|                                                        | 4.21         | -0.04                      | 0.08 | 0.04   | 0.00                       | 0.06 | 0.05   | 4        |
| 5.65                                                   | 0.00         | 0.03                       | 0.04 | 0.00   | 0.05                       | 0.04 | 4      |          |
| SO <sub>4</sub> <sup>2-</sup> test                     | 0.09         | -0.05                      | 0.06 | 0.04   | -0.01                      | 0.08 | 0.07   | 4        |
|                                                        | 0.12         | -0.12                      | 0.04 | 0.04   | -0.05                      | 0.03 | 0.02   | 4        |
|                                                        | 0.15         | -0.11                      | 0.12 | 0.04   | -0.07                      | 0.07 | 0.06   | 4        |
|                                                        | 0.18         | -0.06                      | 0.13 | 0.04   | -0.04                      | 0.10 | 0.08   | 4        |
|                                                        | 0.39         | -0.07                      | 0.07 | 0.04   | -0.03                      | 0.05 | 0.04   | 4        |
|                                                        | 0.55         | -0.09                      | 0.08 | 0.04   | -0.05                      | 0.03 | 0.02   | 4        |
|                                                        | 0.72         | -0.08                      | 0.08 | 0.04   | -0.03                      | 0.04 | 0.03   | 4        |
|                                                        | 1.06         | -0.05                      | 0.07 | 0.04   | -0.01                      | 0.03 | 0.02   | 4        |
|                                                        | 1.75         | -0.08                      | 0.07 | 0.04   | -0.03                      | 0.09 | 0.07   | 4        |
|                                                        | 2.79         | -0.03                      | 0.10 | 0.04   | -0.02                      | 0.08 | 0.07   | 4        |
|                                                        | 4.21         | 0.00                       | 0.02 | 0.04   | 0.04                       | 0.03 | 0.02   | 4        |
| 5.65                                                   | -0.01        | 0.07                       | 0.04 | 0.05   | 0.10                       | 0.08 | 4      |          |
| Cl <sup>-</sup> and SO <sub>4</sub> <sup>2-</sup> test | 0.09         | -0.01                      | 0.09 | 0.04   | -0.01                      | 0.11 | 0.07   | 5        |
|                                                        | 0.12         | 0.04                       | 0.14 | 0.04   | -0.04                      | 0.15 | 0.09   | 5        |
|                                                        | 0.15         | -0.09                      | 0.08 | 0.04   | -0.02                      | 0.08 | 0.04   | 7        |
|                                                        | 0.18         | -0.06                      | 0.12 | 0.04   | 0.01                       | 0.10 | 0.05   | 7        |
|                                                        | 0.39         | -0.05                      | 0.06 | 0.04   | -0.03                      | 0.07 | 0.03   | 8        |
|                                                        | 0.55         | -0.12                      | 0.10 | 0.04   | -0.02                      | 0.09 | 0.05   | 6        |
|                                                        | 0.72         | -0.13                      | 0.06 | 0.04   | -0.05                      | 0.10 | 0.05   | 6        |
|                                                        | 1.06         | -0.07                      | 0.04 | 0.04   | -0.06                      | 0.10 | 0.06   | 5        |
|                                                        | 1.75         | -0.07                      | 0.12 | 0.04   | -0.03                      | 0.10 | 0.06   | 5        |
|                                                        | 2.79         | -0.06                      | 0.07 | 0.04   | 0.00                       | 0.13 | 0.08   | 5        |
|                                                        | 4.21         | -0.04                      | 0.05 | 0.04   | -0.12                      | 0.10 | 0.04   | 7        |
| 5.65                                                   | -0.07        | 0.12                       | 0.04 | 0.01   | 0.07                       | 0.03 | 8      |          |

Table B. DOC tests,  $\delta^{30}\text{Si}$  (‰) and  $\delta^{29}\text{Si}$  (‰) values for untreated samples and UV samples. and the associated 2 SD = two standard deviation and their 95% confidence intervals ( $CI = t \times SD / \sqrt{n}$ ).

| sample name | Ratio<br>[DOC]/[Si] | untreated samples          |      |        |                            |      |        |   | treated samples            |      |        |                            |      |        |   |
|-------------|---------------------|----------------------------|------|--------|----------------------------|------|--------|---|----------------------------|------|--------|----------------------------|------|--------|---|
|             |                     | $\delta^{30}\text{Si}$ (‰) |      |        | $\delta^{29}\text{Si}$ (‰) |      |        | n | $\delta^{30}\text{Si}$ (‰) |      |        | $\delta^{29}\text{Si}$ (‰) |      |        | n |
|             |                     | mean                       | 2 SD | 95% CI | mean                       | 2 SD | 95% CI |   | mean                       | 2 SD | 95% CI | mean                       | 2 SD | 95% CI |   |
| GW11        | 0.08                | 0.10                       | 0.04 | 0.03   | 0.06                       | 0.07 | 0.06   | 4 | 0.14                       | 0.08 | 0.07   | 0.06                       | 0.08 | 0.07   | 4 |
| GW5         | 0.34                | 0.55                       | 0.04 | 0.03   | 0.29                       | 0.04 | 0.03   | 4 | 0.53                       | 0.08 | 0.06   | 0.27                       | 0.05 | 0.04   | 4 |
| GW2         | 0.82                | 0.16                       | 0.02 | 0.01   | 0.10                       | 0.06 | 0.05   | 4 | 0.20                       | 0.05 | 0.04   | 0.07                       | 0.09 | 0.08   | 4 |
| GW9         | 1.09                | 0.27                       | 0.03 | 0.02   | 0.14                       | 0.05 | 0.04   | 4 | 0.23                       | 0.05 | 0.04   | 0.16                       | 0.07 | 0.05   | 4 |
| SW2         | 1.39                | 0.25                       | 0.04 | 0.03   | 0.14                       | 0.08 | 0.06   | 4 | 0.28                       | 0.01 | 0.01   | 0.15                       | 0.07 | 0.06   | 4 |
| SW3         | 1.47                | 0.31                       | 0.08 | 0.06   | 0.12                       | 0.03 | 0.03   | 4 | 0.32                       | 0.04 | 0.03   | 0.16                       | 0.05 | 0.04   | 4 |
| CS2         | 0.19                | 0.41                       | 0.12 | 0.10   | 0.19                       | 0.07 | 0.05   | 4 | 0.36                       | 0.08 | 0.06   | 0.21                       | 0.05 | 0.04   | 4 |
| RAZS        | 0.49                | 0.33                       | 0.08 | 0.07   | 0.17                       | 0.07 | 0.06   | 4 | 0.36                       | 0.10 | 0.08   | 0.19                       | 0.08 | 0.07   | 4 |
| SG          | 0.74                | 0.89                       | 0.05 | 0.04   | 0.47                       | 0.05 | 0.04   | 4 | 0.92                       | 0.10 | 0.08   | 0.48                       | 0.06 | 0.04   | 4 |
| BH          | 1.32                | 0.41                       | 0.15 | 0.12   | 0.23                       | 0.02 | 0.02   | 4 | 0.42                       | 0.03 | 0.03   | 0.21                       | 0.03 | 0.02   | 4 |
| RUZS        | 5.16                | 0.05                       | 0.07 | 0.06   | 0.00                       | 0.05 | 0.04   | 4 | 0.03                       | 0.04 | 0.03   | 0.01                       | 0.07 | 0.05   | 4 |
| ECH4        | 3.03                | 1.03                       | 0.19 | 0.15   | 0.58                       | 0.12 | 0.10   | 4 | 1.04                       | 0.06 | 0.05   | 0.57                       | 0.12 | 0.10   | 4 |
| ECH7        | 4.09                | 0.95                       | 0.10 | 0.08   | 0.53                       | 0.06 | 0.05   | 4 | 1.04                       | 0.02 | 0.02   | 0.55                       | 0.04 | 0.03   | 4 |
| ECH19       | 6.38                | 0.89                       | 0.05 | 0.06   | 0.50                       | 0.04 | 0.05   | 3 | 0.79                       | 0.18 | 0.14   | 0.44                       | 0.04 | 0.03   | 4 |
